# Supplementary material
Source: PubMed Central journal article supplement (PMC8452523)
Supplement: mmc1.pdf [file mmc1.pdf]

**Supplemental information**

**A highly potent antibody effective  
against SARS-CoV-2 variants of concern**

**Craig Fenwick, Priscilla Turelli, Laurent Perez, Céline Pellaton, Line Esteves-Leuenberger, Alex Farina, Jérémy Campos, Erica Lana, Flurin Fiscalini, Charlène Raclot, Florence Pojer, Kelvin Lau, Davide Demurtas, Marc Descatoire, Victor S. Joo, Mathilde Foglierini, Alessandra Noto, Rana Abdelnabi, Caroline S. Foo, Laura Vangeel, Johan Neyts, Wenjuan Du, Berend-Jan Bosch, Geertruida Veldman, Pieter Leysen, Volker Thiel, Roger LeGrand, Yves Lévy, Didier Trono, and Giuseppe Pantaleo**

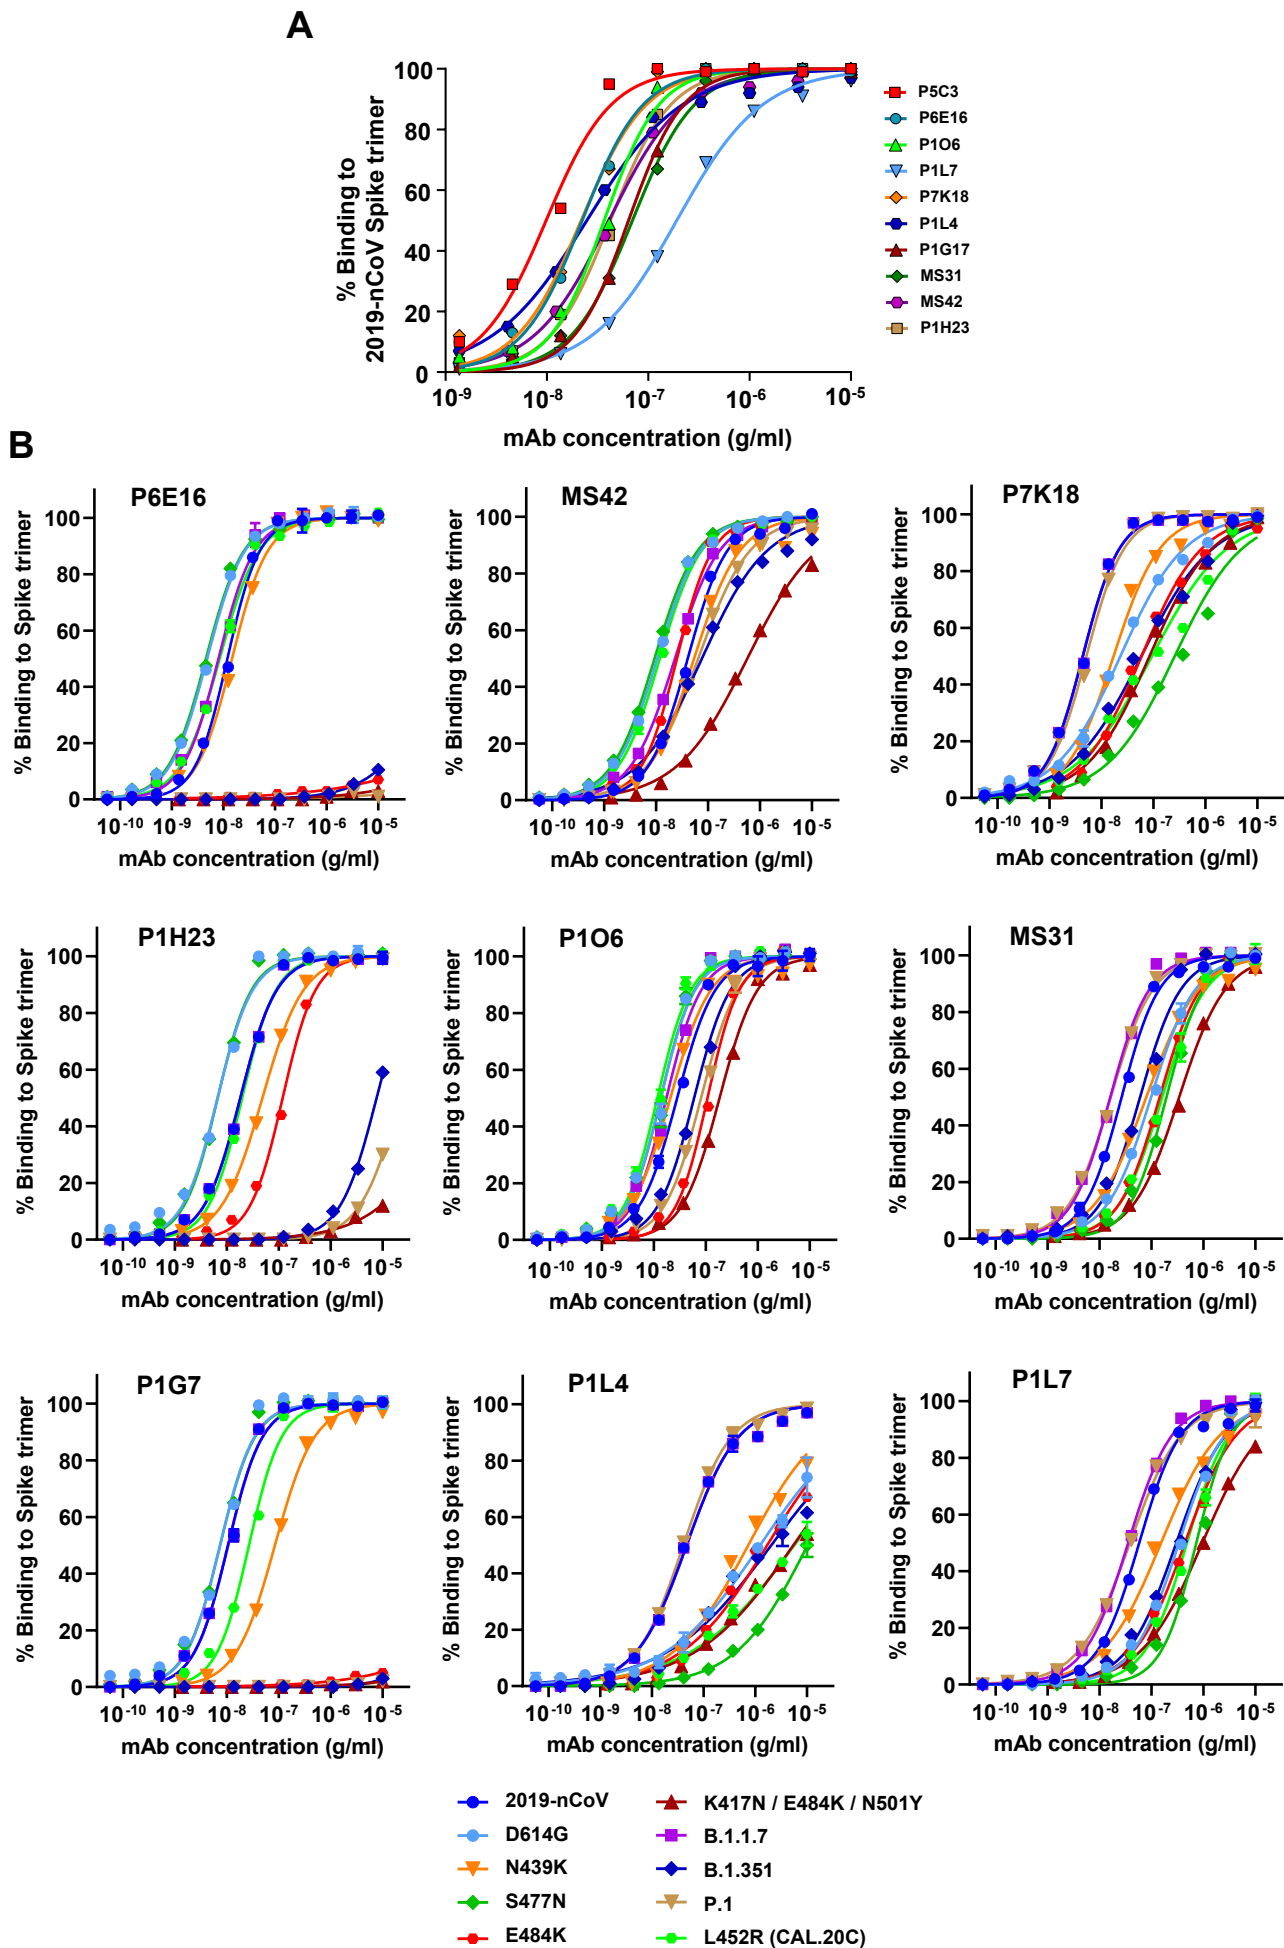

**Figure S1:** Binding affinity of anti-SARS-CoV-2 antibodies for 2019-CoV Spike and a panel of Spike proteins produced with variant residue identified in circulating SARS-CoV-2 viruses. Relates to Figure 1.

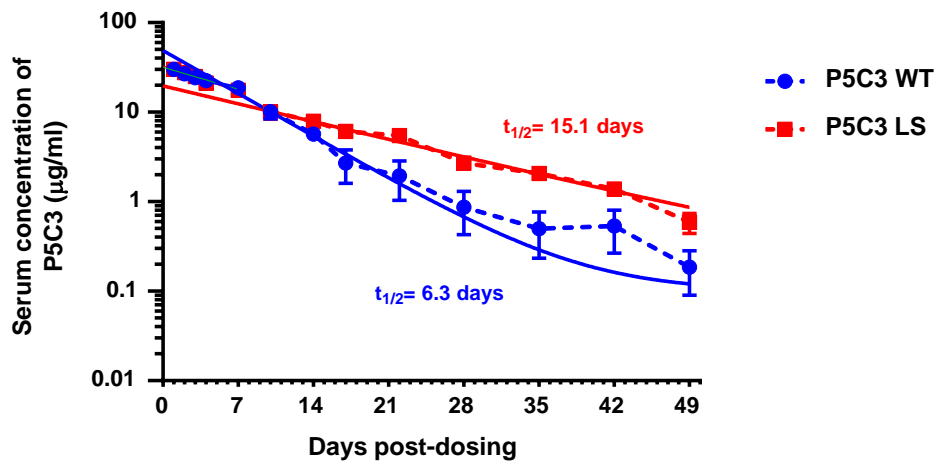

**Figure S2:** Pharmacokinetic properties of P5C3 and P5C3 LS in the human FcRn Tg32 transgenic mouse model. Relates to Figure 3.

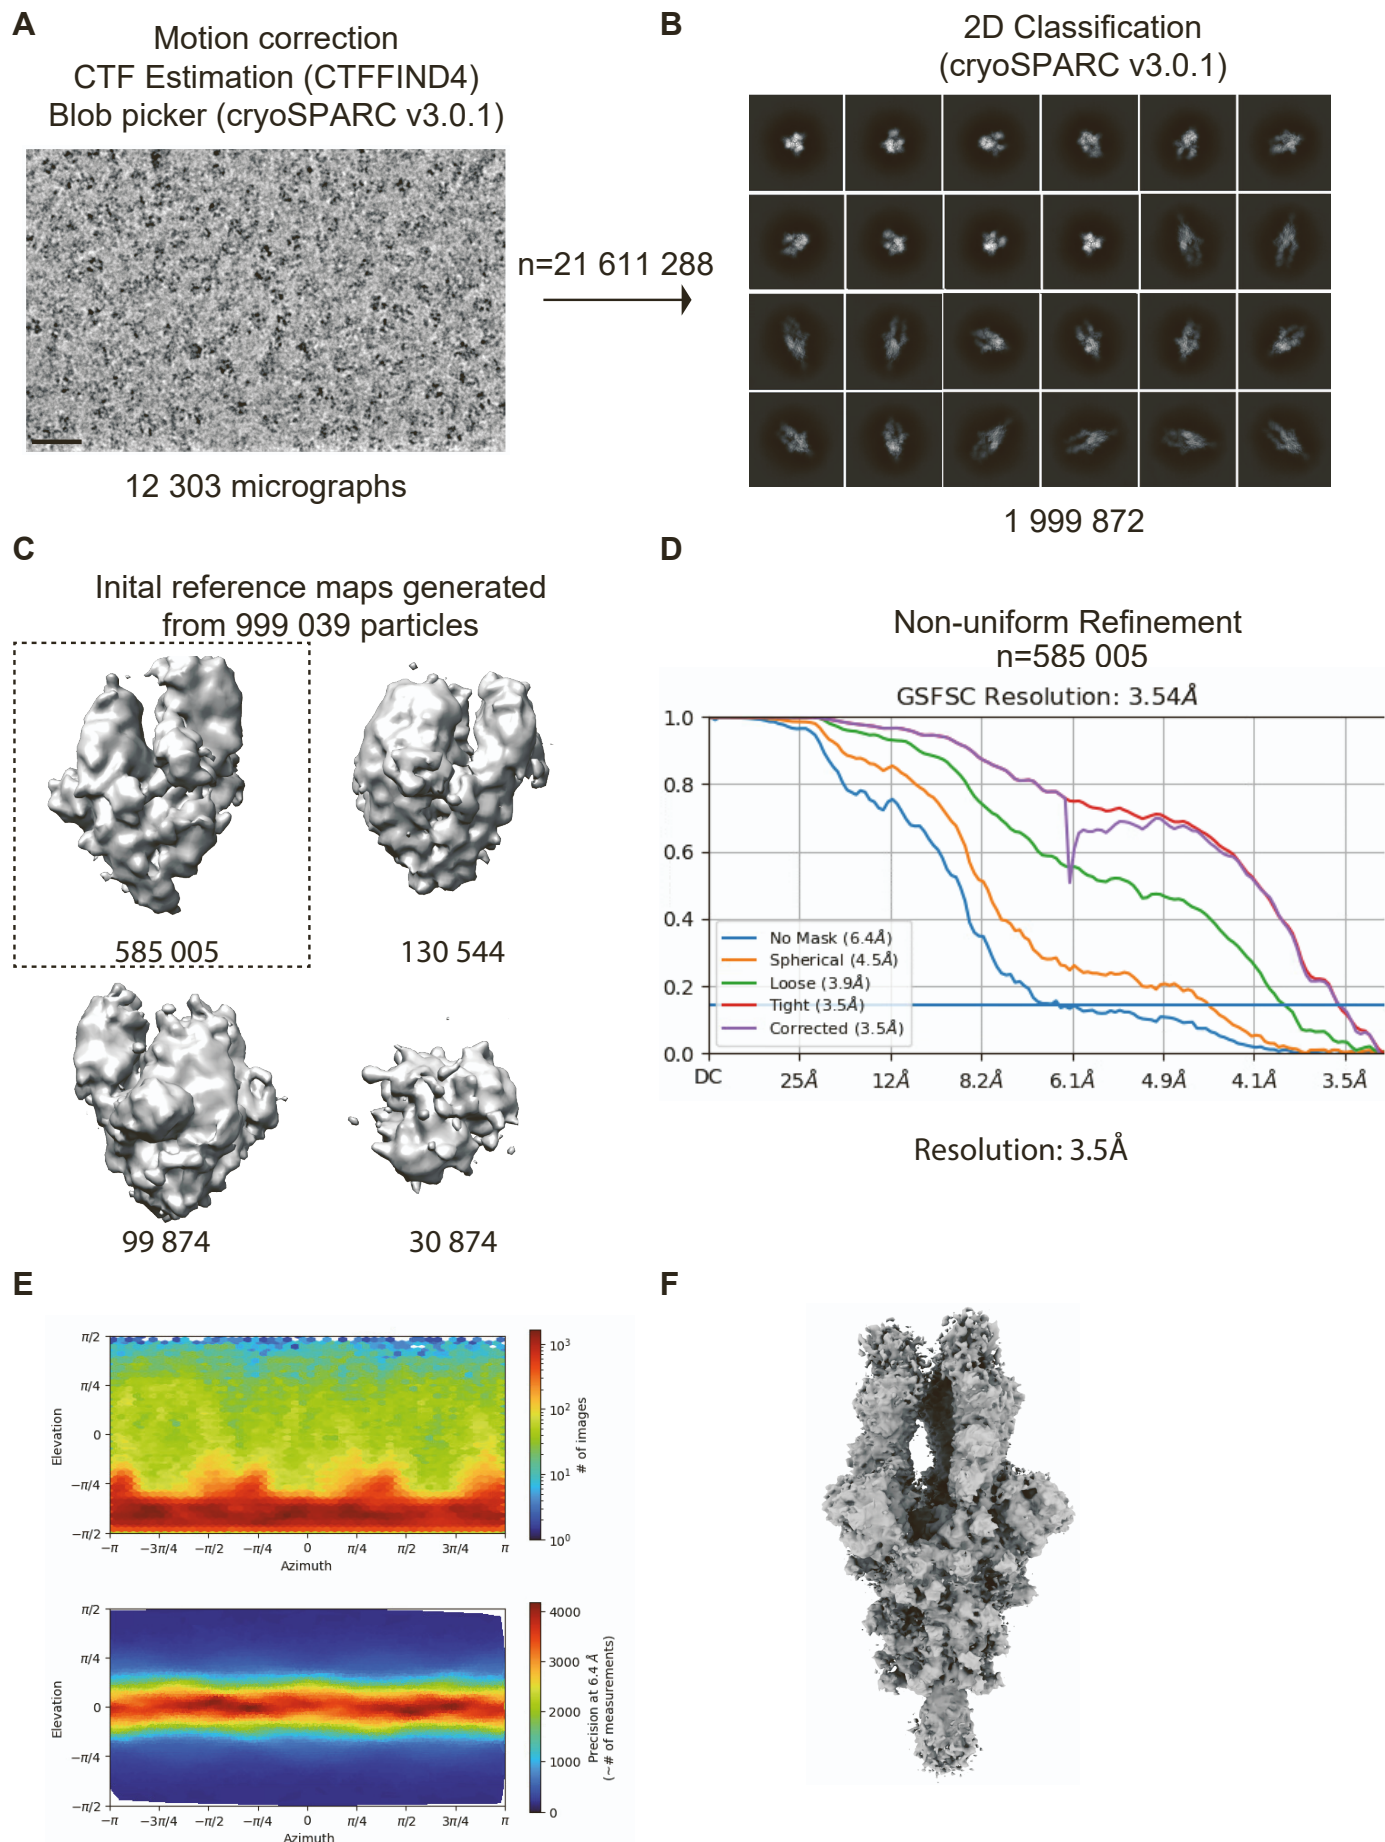

**Figure S3:** Cryo-EM structure determination of P5C3 Fab in complex with SARS-CoV-2 Spike. **(A)** A representative micrograph from the 12 303 micrographs. Scale bar is 50nm **(B)** Representative 2D class averages used for four ab Initio structure reconstruction. **(C)** 3D Class obtained after ab Initio reconstruction. Shown with a black rectangle is ab Initio 3D class used for no-uniform refinement **(D)** Fourier shell correlation (FSC) for the density maps obtained by non-uniform refinement with C1 symmetry. **(E)** Orientations of all particles used in the final refinement are shown as a heat map. **(F)** Unsharpened cryo-EM map for spike trimer with bound P5C3 Fab. Relates to Figure 4 and 5.

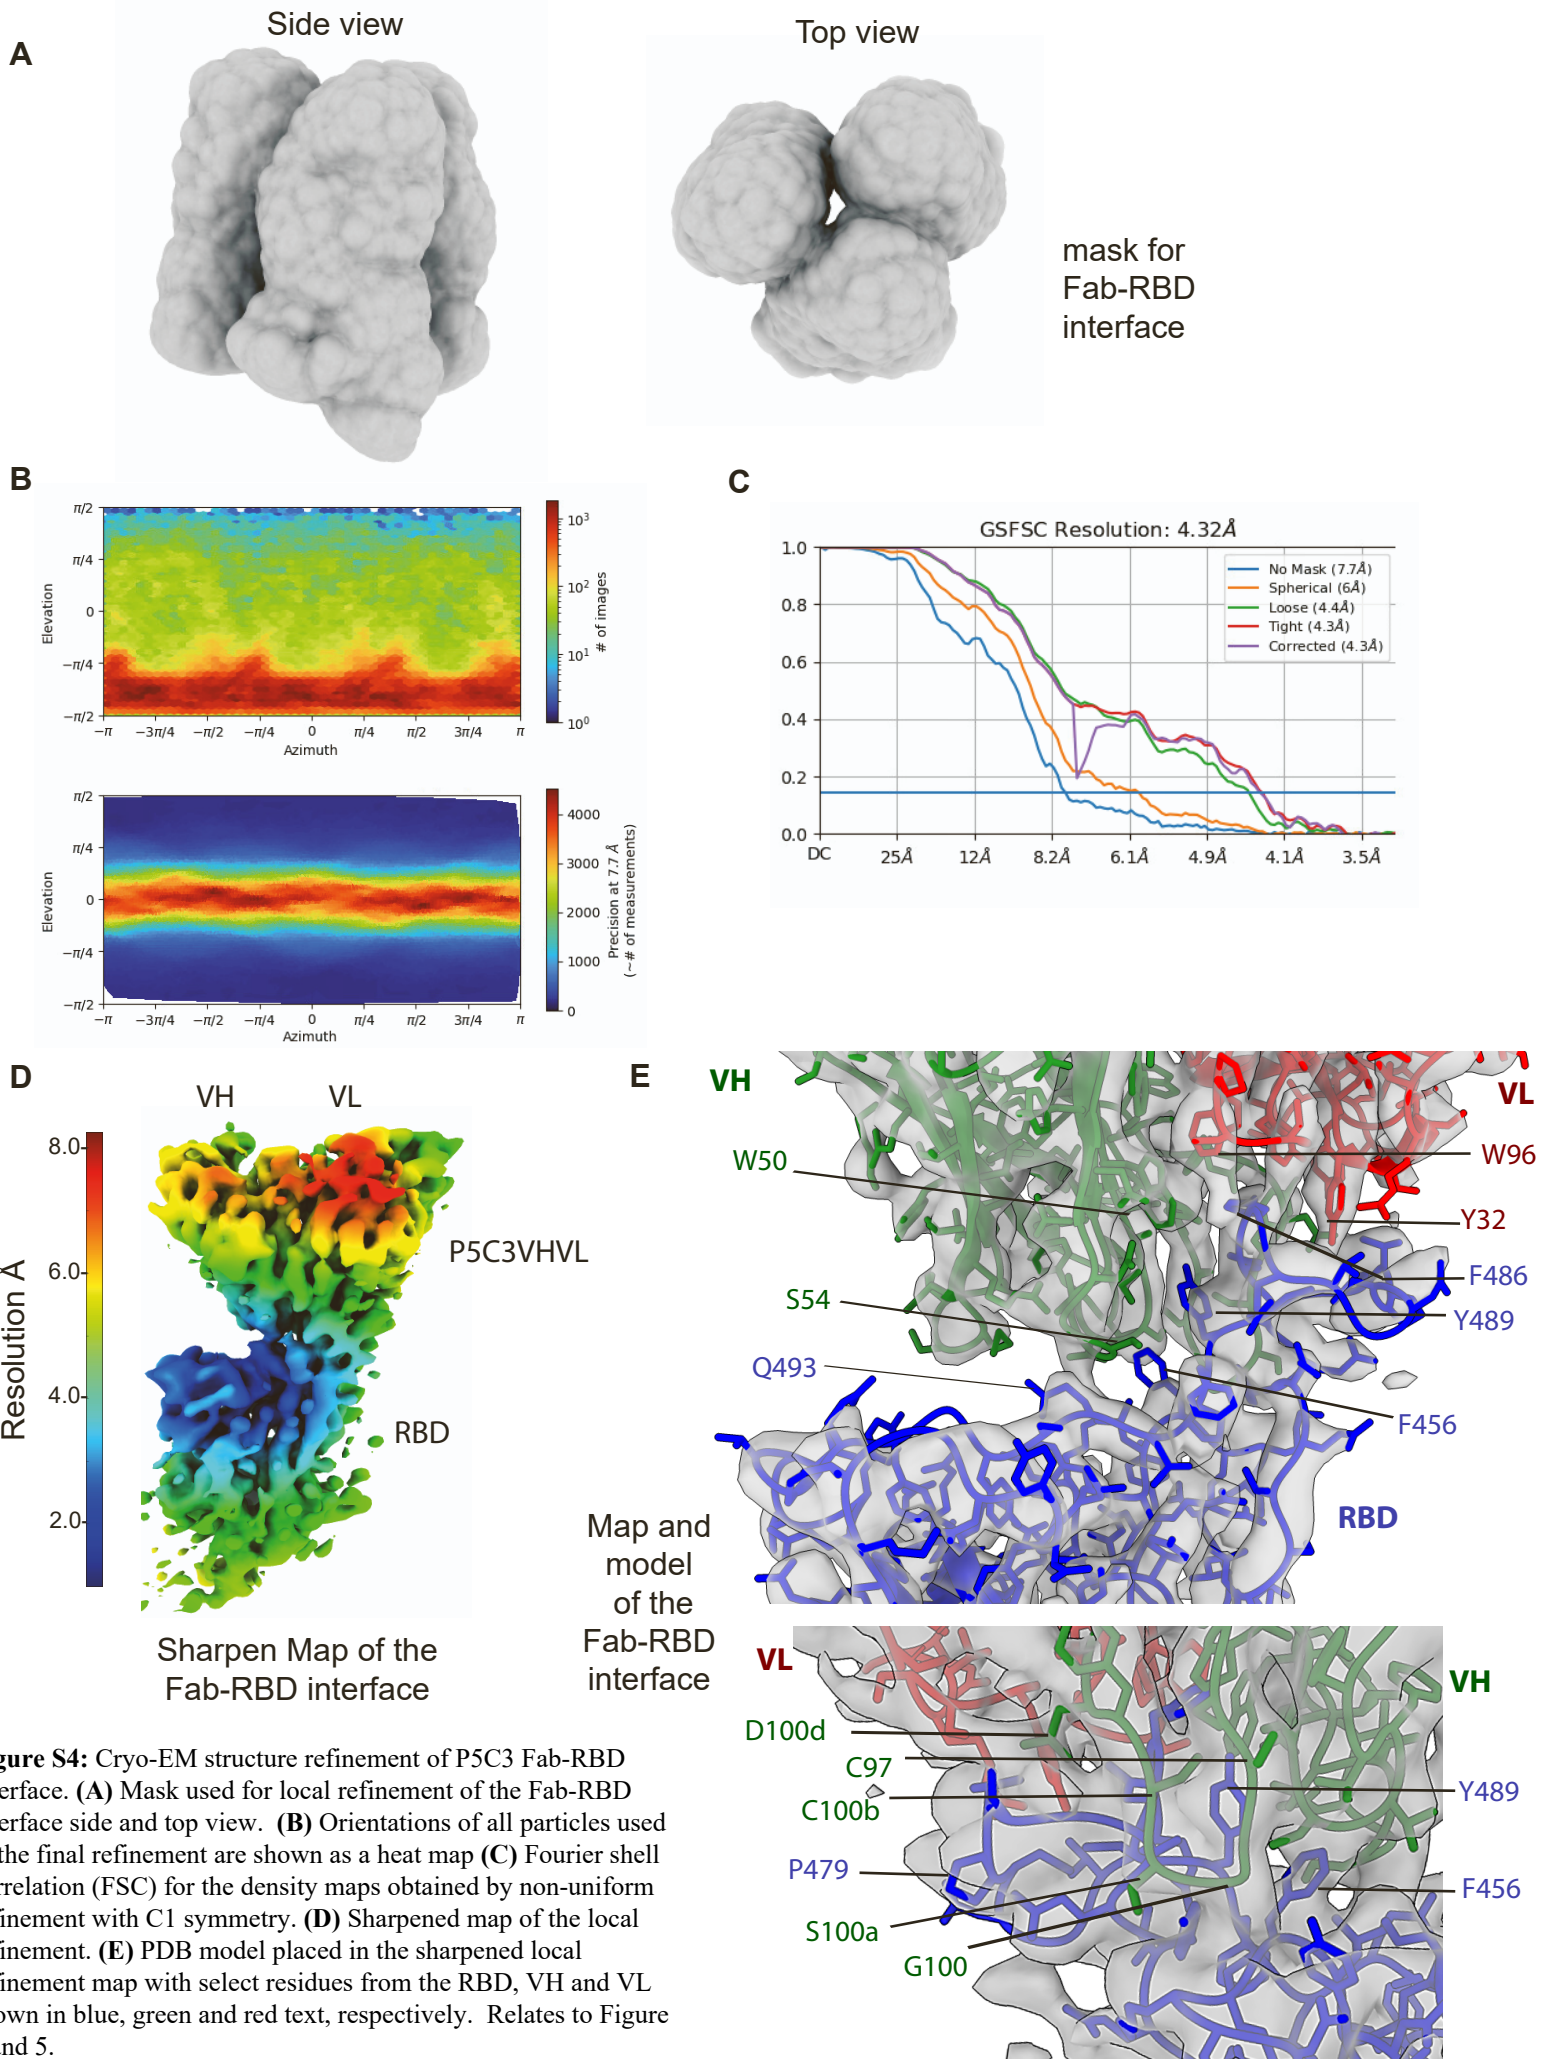



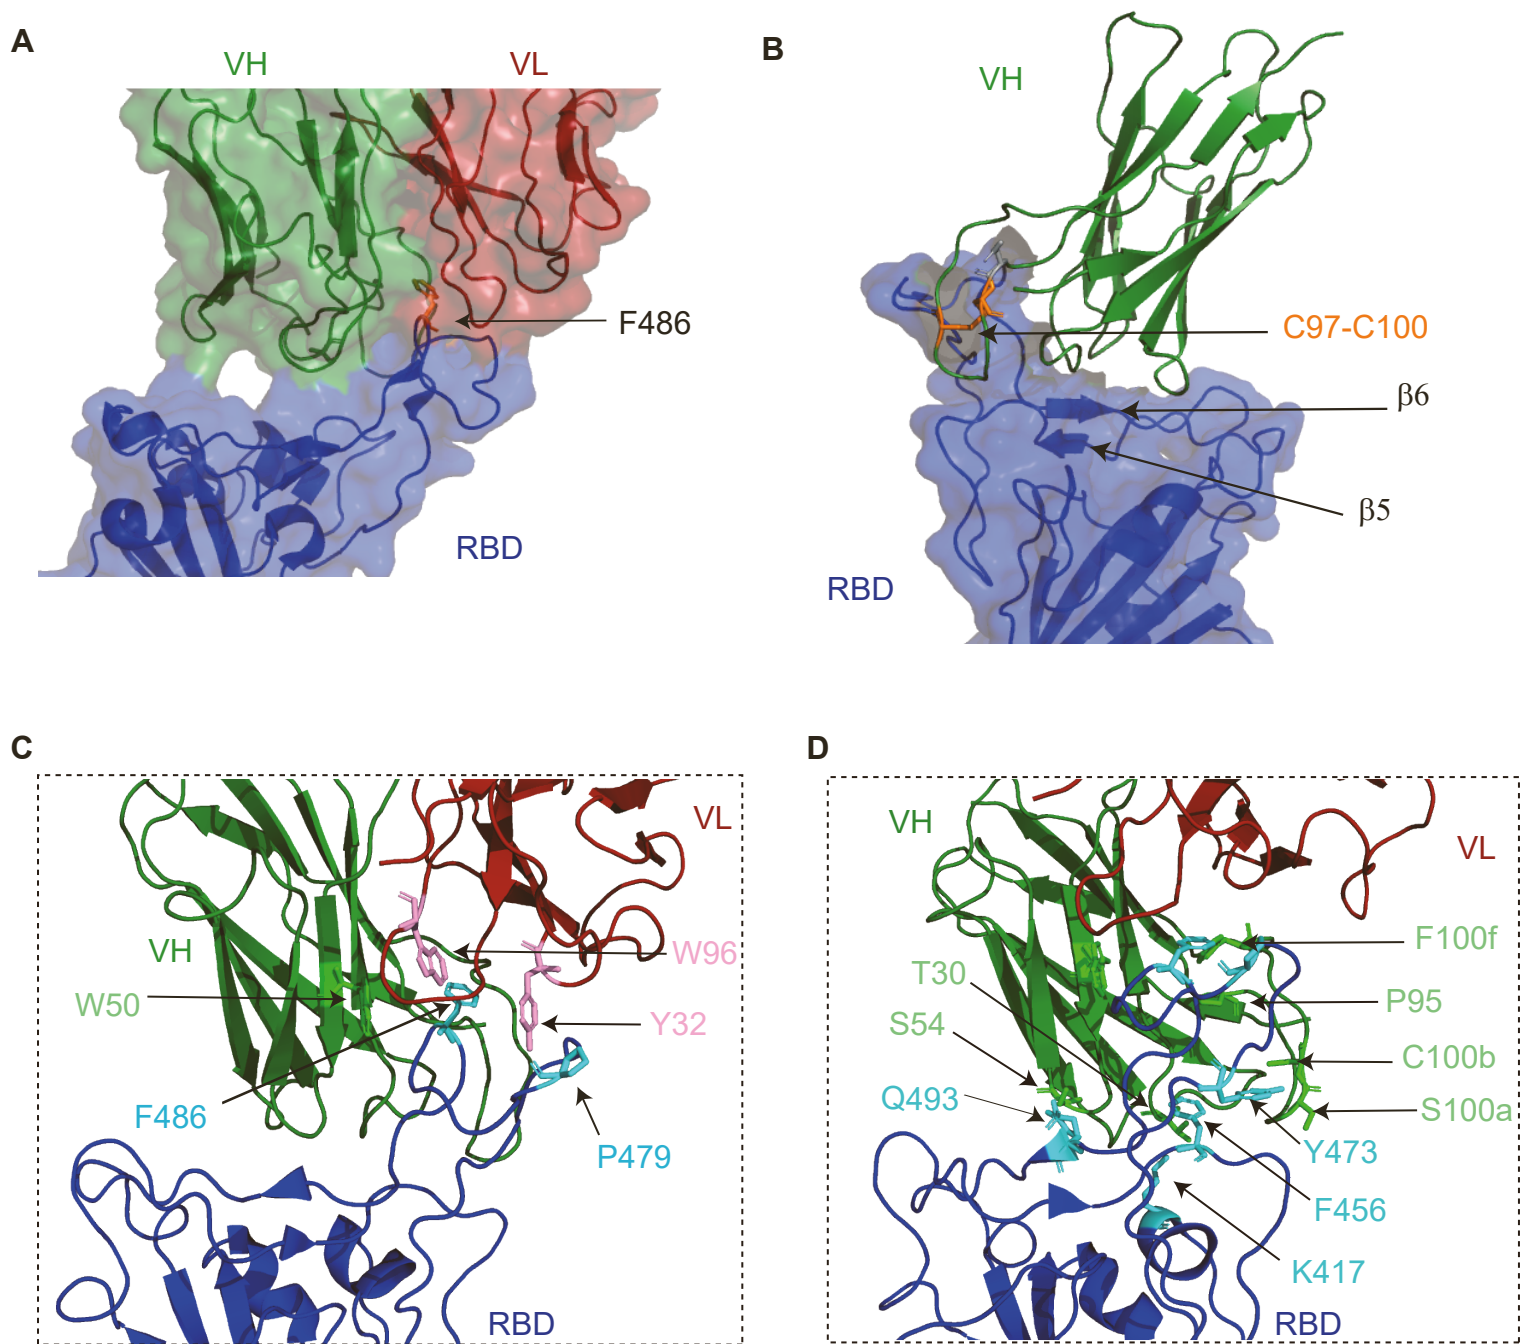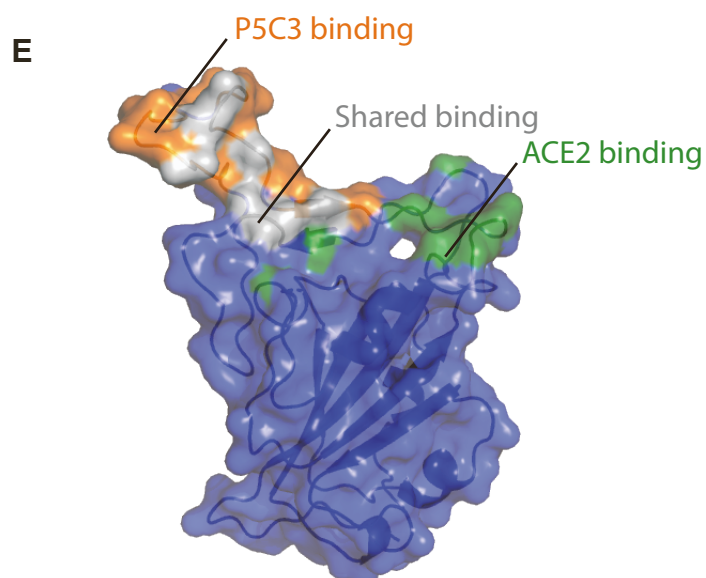

**Figure S5:** Structural details of P5C3 Fab interaction with the SARS-CoV-2 RBD. **(A)** P5C3 Fab is centered on the phenylalanine in position 486 of the RBD. Shown as licorice. **(B)** Disulfide bridges between C97 and C100b is shown in orange. **(C-D)** Cartoon representation of the main P5C3 Fab light chain and heavy chain interaction with RBD. Select residues involved in the interaction are shown in cyan for RBD and pink for the P5C3 light chain and green for the P5C3 heavy chain. **(E)** RBD surface bound by P5C3 (orange), ACE2 (green) and shared by both (grey). Relates to Figure 4 and 5.

**Table S1. Amino acid substitutions and deletions on SARS-CoV-2 variants of concern. Relates to Figure 5.**

| <b>SARS-CoV-2 Variant</b>                       | <b>Spike mutations (RBD domain residues in bold)</b>                                                      |
|-------------------------------------------------|-----------------------------------------------------------------------------------------------------------|
| <b>Alpha / B.1.1.7 / 501Y.V1 (UK)</b>           | $\Delta$ 69-70, $\Delta$ 144, <b>N501Y</b> , A570D, D614G, P681H, T716I, S982A, D1118H                    |
| <b>Beta / B.1.351 / 501Y.V2 (South African)</b> | L18F, D80A, D215G, $\Delta$ 242-244, R246I, <b>K417N</b> , <b>E484K</b> , <b>N501Y</b> , D614G, A701V     |
| <b>Gamma / P.1 / 501Y.V3 (Brazilian)</b>        | L18F, T20N, P26S, D138Y, R190S, <b>K417T</b> , <b>E484K</b> , <b>N501Y</b> , D614G, H655Y, T1027I, V1176F |
| <b>Mink variant 16</b>                          | L5F, $\Delta$ 69-70, <b>Y453F</b> , D614G, N751Y, C1250F)                                                 |
| <b>Cal.20C (Californian)</b>                    | S13I, W152C, <b>L452R</b>                                                                                 |
| <b>B.1.526 / B.1.232 (New York)</b>             | L5F, T95I, D253G, <b>E484K</b> , D614G, A701V                                                             |

**Table S2. Statistics of the Cryo-EM dataset and structure models EM data collection.**  
Relates to Figure 4 and 5

| Structure                                   | Spike D614G+Fab P5C3                                                                  | Local resolution Spike D614G+Fab P5C3 |
|---------------------------------------------|---------------------------------------------------------------------------------------|---------------------------------------|
| EMBD ID                                     | EMD-13190                                                                             | EMD-                                  |
| PDB ID                                      | 7P40                                                                                  |                                       |
| <b>Data collection</b>                      |                                                                                       |                                       |
| Microscope                                  | Titan Krios                                                                           |                                       |
| Detector                                    | Gatan Quantum-LS Energy Filter (GIF) with a Gatan K2 Summit direct electron detector. |                                       |
| Voltage (KV)                                | 300                                                                                   | 300                                   |
| Nominal magnification                       | 105 000                                                                               | 105 000                               |
| Defocus range ( $\mu\text{m}$ )             | 0.8-2.5                                                                               | 0.8-2.5                               |
| Physical pixel ( $\text{\AA}$ )             | 0.82                                                                                  | 0.82                                  |
| Electron dose ( $\text{e}^-/\text{\AA}^2$ ) | 38                                                                                    | 38                                    |
| number of raw frames                        | 30                                                                                    | 30                                    |
| <b>Data processing</b>                      |                                                                                       |                                       |
| Extracted particles (n)                     | 21 611 288                                                                            |                                       |
| Refined particles (n)                       | 1 999 872                                                                             |                                       |
| Particles for final map (n)                 | 585 005                                                                               | 585 005                               |
| Symmetry imposed                            | C1                                                                                    | C1                                    |
| Resolution                                  | 3.5                                                                                   | 4.3                                   |
| FSC threshold                               | 0.143                                                                                 | 0.143                                 |
| <b>Refinement</b>                           |                                                                                       |                                       |
| Initial model used                          | PDB ID: 7K4N                                                                          |                                       |
| Map sharpening B-Factor ( $\text{\AA}^2$ )  | 95.9                                                                                  |                                       |
| composition (n)                             | 9 Chains                                                                              | 3 Chains                              |
| Atoms                                       | 26466 (hydrogens: 0)                                                                  | 3309 (hydrogens: 0)                   |
| Residues                                    | Protein: 3687                                                                         | Protein:427                           |
| Ligands                                     | 0                                                                                     | 0                                     |
| Overall B-Factor ( $\text{\AA}^2$ )         | 82.4                                                                                  | 0.010 (0)                             |
| Protein (min/max/mean)                      | (-36.40/65.15/1.00)                                                                   | (-49.3/184.66/3.79)                   |
| Ligand (min/max/mean)                       | 0                                                                                     | 0                                     |
| <b>Bonds (RMSD)</b>                         |                                                                                       |                                       |
| length ( $\text{\AA}$ ) ( $n > 4\sigma$ )   | 0.010 (0)                                                                             | 0.003 (0)                             |
| Angles ( $^\circ$ ) ( $n > 4\sigma$ )       | 1.187 (1)                                                                             | 0.791 (1)                             |
| CC mask                                     | 0.72                                                                                  | 0.73                                  |
| <b>Validation</b>                           |                                                                                       |                                       |
| <b>Ramachandran plot</b>                    |                                                                                       |                                       |
| Residues favored (%)                        | 91.32                                                                                 | 87.89                                 |
| Residues allowed (%)                        | 7.86                                                                                  | 11.88                                 |
| Rotamer outliers (%)                        | 0.83                                                                                  | 0.28                                  |
| Clash Score                                 | 8.06                                                                                  | 15.92                                 |
| MolProbity score                            | 2.34                                                                                  | 2.31                                  |
